# Supplementary material for: Understanding the reaction kinetics of heterogeneous 1-hexene hydroformylation
Source: Royal Society of Chemistry journal article supplement (doi:10.1039/d5re00288e), 2025-01-01
Supplement: d5re00288e2.xlsx [file d5re00288e2.xlsx]

## Sheet: Sheet1
T P	1	1.1	1.2	1.3	1.4	1.5	1.6	1.7	1.8	1.9	2	2.1	2.2	2.3	2.4	2.5	2.6	2.7	2.8	2.9	3	3.1	3.2	3.3	3.4	3.5	3.6	3.7	3.8	3.9	4	4.1	4.2	4.3	4.4	4.5	4.6	4.7	4.8	4.9	5	5.1	5.2	5.3	5.4	5.5	5.6	5.7	5.8
40	0.85841	0.92562	0.99333	1.06147	1.12999	1.19885	1.268	1.3374	1.40702	1.47685	1.54684	1.61699	1.68727	1.75767	1.82817	1.89877	1.96944	2.04019	2.111	2.18186	2.25278	2.32373	2.39472	2.46574	2.53679	2.60787	2.67896	2.75007	2.82119	2.89233	2.96347	3.03462	3.10578	3.17694	3.2481	3.31926	3.39042	3.46158	3.53273	3.60388	3.67502	3.74616	3.8173	3.88842	3.95954	4.03065	4.10175	4.17284	4.24392
41	0.83057	0.89424	0.9584	1.023	1.08797	1.15328	1.21889	1.28475	1.35085	1.41715	1.48363	1.55027	1.61705	1.68396	1.75097	1.81809	1.8853	1.95259	2.01994	2.08736	2.15483	2.22236	2.28992	2.35752	2.42516	2.49282	2.56051	2.62822	2.69595	2.7637	2.83146	2.89923	2.96701	3.0348	3.1026	3.17039	3.23819	3.306	3.3738	3.4416	3.5094	3.5772	3.64499	3.71278	3.78057	3.84835	3.91612	3.98389	4.05164
42	0.80469	0.86502	0.92583	0.98707	1.04869	1.11064	1.17288	1.2354	1.29814	1.3611	1.42424	1.48755	1.551	1.61459	1.6783	1.74212	1.80603	1.87003	1.9341	1.99824	2.06244	2.1267	2.19101	2.25536	2.31975	2.38417	2.44863	2.51311	2.57761	2.64214	2.70669	2.77125	2.83582	2.9004	2.965	3.0296	3.09421	3.15883	3.22345	3.28807	3.35269	3.41731	3.48193	3.54656	3.61117	3.67579	3.7404	3.80501	3.86962
43	0.78066	0.83784	0.89548	0.95355	1.01198	1.07075	1.12981	1.18914	1.24871	1.30849	1.36846	1.42861	1.48891	1.54935	1.60991	1.67059	1.73137	1.79223	1.85319	1.91421	1.97531	2.03646	2.09767	2.15893	2.22023	2.28158	2.34296	2.40437	2.46581	2.52727	2.58876	2.65026	2.71179	2.77333	2.83488	2.89645	2.95803	3.01961	3.0812	3.1428	3.2044	3.26601	3.32762	3.38923	3.45084	3.51245	3.57406	3.63567	3.69727
44	0.75838	0.81257	0.86722	0.92228	0.9777	1.03346	1.08951	1.14582	1.20238	1.25915	1.31611	1.37325	1.43055	1.488	1.54557	1.60326	1.66106	1.71896	1.77695	1.83501	1.89315	1.95135	2.00962	2.06793	2.1263	2.18471	2.24317	2.30166	2.36018	2.41873	2.47731	2.53591	2.59454	2.65318	2.71185	2.77052	2.82922	2.88792	2.94663	3.00536	3.06409	3.12282	3.18157	3.24031	3.29907	3.35782	3.41658	3.47533	3.53409
45	0.73772	0.78911	0.84093	0.89315	0.94572	0.99862	1.05182	1.10527	1.15897	1.21288	1.26699	1.32128	1.37573	1.43033	1.48507	1.53992	1.59489	1.64996	1.70513	1.76037	1.8157	1.8711	1.92656	1.98208	2.03765	2.09328	2.14895	2.20466	2.26041	2.31619	2.372	2.42784	2.48371	2.5396	2.59551	2.65144	2.70739	2.76335	2.81933	2.87531	2.93131	2.98732	3.04334	3.09936	3.1554	3.21143	3.26747	3.32352	3.37956
46	0.7186	0.76734	0.81649	0.86602	0.91591	0.96611	1.01659	1.06734	1.11833	1.16953	1.22093	1.27251	1.32426	1.37616	1.42819	1.48035	1.53263	1.58501	1.63749	1.69006	1.74272	1.79544	1.84824	1.9011	1.95402	2.00699	2.06001	2.11307	2.16618	2.21932	2.2725	2.32572	2.37896	2.43223	2.48552	2.53883	2.59217	2.64552	2.69889	2.75228	2.80568	2.85909	2.91252	2.96595	3.0194	3.07285	3.1263	3.17977	3.23324
47	0.70093	0.74716	0.79379	0.84079	0.88813	0.93577	0.9837	1.03188	1.0803	1.12893	1.17776	1.22677	1.27595	1.32528	1.37475	1.42435	1.47407	1.5239	1.57383	1.62385	1.67396	1.72415	1.77441	1.82473	1.87512	1.92557	1.97607	2.02662	2.07721	2.12784	2.17852	2.22923	2.27997	2.33074	2.38154	2.43237	2.48322	2.53409	2.58498	2.63589	2.68681	2.73776	2.78871	2.83968	2.89066	2.94165	2.99265	3.04366	3.09467
48	0.68462	0.72849	0.77274	0.81734	0.86227	0.9075	0.953	0.99875	1.04474	1.09093	1.13732	1.1839	1.23064	1.27753	1.32457	1.37173	1.41902	1.46642	1.51392	1.56152	1.60921	1.65698	1.70483	1.75274	1.80073	1.84877	1.89687	1.94502	1.99322	2.04147	2.08975	2.13808	2.18644	2.23484	2.28326	2.33172	2.3802	2.42871	2.47724	2.52579	2.57436	2.62295	2.67155	2.72017	2.76881	2.81746	2.86611	2.91478	2.96346
49	0.66958	0.71122	0.75323	0.79557	0.83823	0.88117	0.92437	0.96783	1.0115	1.05539	1.09947	1.14373	1.18816	1.23274	1.27746	1.32231	1.36729	1.41238	1.45758	1.50287	1.54826	1.59373	1.63928	1.6849	1.73059	1.77635	1.82216	1.86803	1.91396	1.95993	2.00594	2.052	2.09809	2.14423	2.19039	2.23659	2.28282	2.32907	2.37535	2.42166	2.46798	2.51433	2.5607	2.60708	2.65348	2.6999	2.74633	2.79277	2.83923
50	0.65574	0.69529	0.73518	0.77538	0.81589	0.85667	0.8977	0.93898	0.98047	1.02217	1.06406	1.10613	1.14836	1.19074	1.23327	1.27592	1.3187	1.3616	1.4046	1.44771	1.4909	1.53419	1.57755	1.62099	1.6645	1.70808	1.75172	1.79542	1.83917	1.88297	1.92683	1.97072	2.01466	2.05863	2.10265	2.14669	2.19077	2.23488	2.27902	2.32318	2.36737	2.41158	2.45582	2.50007	2.54434	2.58863	2.63294	2.67726	2.72159
51	0.64304	0.6806	0.71849	0.75668	0.79515	0.83389	0.87288	0.91209	0.95152	0.99114	1.03095	1.07094	1.11109	1.15139	1.19183	1.2324	1.27309	1.3139	1.35482	1.39584	1.43696	1.47816	1.51945	1.56081	1.60225	1.64375	1.68532	1.72695	1.76864	1.81038	1.85217	1.894	1.93588	1.97781	2.01977	2.06176	2.1038	2.14586	2.18796	2.23008	2.27223	2.31441	2.35661	2.39883	2.44107	2.48334	2.52562	2.56792	2.61023
52	0.63139	0.66709	0.70309	0.73938	0.77594	0.81274	0.84979	0.88705	0.92452	0.96218	1.00003	1.03804	1.07621	1.11453	1.153	1.19159	1.2303	1.26913	1.30807	1.34711	1.38624	1.42546	1.46477	1.50416	1.54362	1.58315	1.62275	1.66241	1.70213	1.74191	1.78173	1.82161	1.86153	1.90149	1.9415	1.98155	2.02163	2.06174	2.10189	2.14207	2.18228	2.22252	2.26278	2.30307	2.34338	2.38371	2.42406	2.46443	2.50482
53	0.62074	0.65468	0.6889	0.7234	0.75814	0.79312	0.82833	0.86375	0.89937	0.93518	0.97116	1.0073	1.0436	1.08005	1.11663	1.15334	1.19017	1.22712	1.26418	1.30133	1.33858	1.37593	1.41335	1.45086	1.48844	1.5261	1.56382	1.6016	1.63945	1.67735	1.71531	1.75332	1.79137	1.82947	1.86762	1.9058	1.94402	1.98228	2.02058	2.0589	2.09726	2.13565	2.17406	2.21251	2.25097	2.28946	2.32797	2.36651	2.40506
54	0.61103	0.64331	0.67586	0.70865	0.74169	0.77495	0.80842	0.8421	0.87597	0.91001	0.94423	0.9786	1.01313	1.04779	1.08259	1.11752	1.15257	1.18773	1.223	1.25836	1.29383	1.32938	1.36502	1.40074	1.43653	1.4724	1.50833	1.54433	1.5804	1.61652	1.65269	1.68892	1.7252	1.76152	1.79789	1.8343	1.87075	1.90724	1.94377	1.98033	2.01692	2.05354	2.0902	2.12688	2.16359	2.20032	2.23708	2.27386	2.31066
55	0.6022	0.63292	0.66388	0.69508	0.7265	0.75813	0.78997	0.822	0.85421	0.88659	0.91913	0.95183	0.98467	1.01765	1.05076	1.084	1.11735	1.15081	1.18438	1.21805	1.25181	1.28566	1.3196	1.35362	1.38771	1.42188	1.45612	1.49042	1.52478	1.5592	1.59368	1.62821	1.6628	1.69743	1.73211	1.76683	1.80159	1.83639	1.87123	1.90611	1.94102	1.97596	2.01094	2.04594	2.08097	2.11603	2.15112	2.18622	2.22136
56	0.5942	0.62345	0.65292	0.6826	0.7125	0.7426	0.77288	0.80335	0.83399	0.8648	0.89576	0.92687	0.95812	0.9895	1.02101	1.05264	1.08438	1.11624	1.14819	1.18025	1.2124	1.24463	1.27695	1.30935	1.34183	1.37438	1.407	1.43968	1.47243	1.50524	1.5381	1.57102	1.60399	1.63701	1.67007	1.70318	1.73634	1.76953	1.80276	1.83603	1.86934	1.90268	1.93605	1.96946	2.00289	2.03635	2.06984	2.10335	2.13689
57	0.58699	0.61484	0.6429	0.67116	0.69962	0.72827	0.75709	0.78609	0.81525	0.84456	0.87402	0.90363	0.93337	0.96324	0.99323	1.02334	1.05355	1.08388	1.1143	1.14483	1.17544	1.20614	1.23692	1.26779	1.29872	1.32974	1.36082	1.39196	1.42317	1.45444	1.48576	1.51715	1.54858	1.58006	1.61159	1.64317	1.67479	1.70645	1.73815	1.76989	1.80167	1.83348	1.86532	1.8972	1.92911	1.96105	1.99301	2.025	2.05702
58	0.58051	0.60705	0.63378	0.6607	0.6878	0.71507	0.74252	0.77012	0.79788	0.82578	0.85383	0.88201	0.91032	0.93875	0.9673	0.99597	1.02474	1.05362	1.08259	1.11165	1.14081	1.17005	1.19938	1.22878	1.25825	1.2878	1.31742	1.3471	1.37685	1.40665	1.43651	1.46643	1.4964	1.52642	1.55649	1.5866	1.61676	1.64696	1.6772	1.70748	1.7378	1.76815	1.79854	1.82896	1.85942	1.8899	1.92041	1.95096	1.98152
59	0.57473	0.60003	0.62551	0.65116	0.67697	0.70295	0.72909	0.75537	0.78181	0.80838	0.83508	0.86192	0.88887	0.91595	0.94314	0.97043	0.99783	1.02533	1.05293	1.08061	1.10839	1.13624	1.16418	1.19219	1.22028	1.24844	1.27666	1.30495	1.3333	1.36171	1.39018	1.41871	1.44728	1.47591	1.50458	1.5333	1.56207	1.59088	1.61973	1.64862	1.67755	1.70651	1.73551	1.76455	1.79361	1.82271	1.85184	1.88099	1.91018
60	0.56961	0.59374	0.61803	0.64248	0.66709	0.69184	0.71674	0.74178	0.76696	0.79227	0.81771	0.84327	0.86894	0.89473	0.92063	0.94663	0.97273	0.99892	1.02521	1.05158	1.07804	1.10459	1.1312	1.1579	1.18467	1.2115	1.2384	1.26537	1.2924	1.31948	1.34662	1.37382	1.40107	1.42837	1.45572	1.48311	1.51055	1.53804	1.56556	1.59313	1.62073	1.64837	1.67604	1.70375	1.7315	1.75927	1.78708	1.81491	1.84278
61	0.5651	0.58813	0.6113	0.63462	0.65808	0.68168	0.70541	0.72928	0.75327	0.77739	0.80163	0.82598	0.85044	0.87501	0.89968	0.92446	0.94932	0.97428	0.99933	1.02446	1.04967	1.07497	1.10034	1.12578	1.15129	1.17687	1.20251	1.22822	1.25399	1.27981	1.30569	1.33163	1.35762	1.38365	1.40974	1.43587	1.46205	1.48827	1.51453	1.54083	1.56717	1.59355	1.61996	1.64641	1.67289	1.6994	1.72595	1.75252	1.77913
62	0.56118	0.58316	0.60528	0.62753	0.64991	0.67242	0.69505	0.7178	0.74068	0.76367	0.78677	0.80998	0.83329	0.85671	0.88022	0.90383	0.92753	0.95131	0.97518	0.99914	1.02317	1.04728	1.07146	1.09571	1.12003	1.14442	1.16887	1.19338	1.21795	1.24257	1.26725	1.29199	1.31677	1.34161	1.36649	1.39142	1.41639	1.44141	1.46647	1.49157	1.5167	1.54188	1.56709	1.59233	1.61761	1.64292	1.66827	1.69364	1.71904
63	0.55781	0.57881	0.59993	0.62117	0.64253	0.664	0.68559	0.70729	0.72911	0.75103	0.77306	0.79519	0.81741	0.83974	0.86215	0.88466	0.90725	0.92992	0.95268	0.97552	0.99843	1.02141	1.04446	1.06759	1.09078	1.11403	1.13734	1.16072	1.18415	1.20763	1.23117	1.25477	1.27841	1.3021	1.32584	1.34962	1.37345	1.39732	1.42123	1.44519	1.46918	1.4932	1.51727	1.54137	1.5655	1.58966	1.61386	1.63809	1.66234
64	0.55496	0.57503	0.59521	0.61549	0.63588	0.65638	0.67699	0.6977	0.71851	0.73942	0.76043	0.78154	0.80274	0.82403	0.8454	0.86686	0.88841	0.91003	0.93173	0.9535	0.97535	0.99727	1.01925	1.0413	1.06342	1.08559	1.10783	1.13012	1.15247	1.17487	1.19733	1.21984	1.24239	1.265	1.28765	1.31034	1.33308	1.35586	1.37868	1.40154	1.42444	1.44737	1.47034	1.49335	1.51639	1.53946	1.56257	1.5857	1.60886
65	0.55261	0.5718	0.59109	0.61047	0.62994	0.64952	0.66919	0.68896	0.70883	0.72879	0.74884	0.76898	0.7892	0.80951	0.8299	0.85037	0.87092	0.89155	0.91224	0.93301	0.95385	0.97476	0.99573	1.01676	1.03785	1.05901	1.08022	1.10149	1.12281	1.14418	1.16561	1.18708	1.2086	1.23017	1.25179	1.27344	1.29514	1.31689	1.33867	1.36049	1.38235	1.40424	1.42617	1.44813	1.47013	1.49216	1.51423	1.53632	1.55844
66	0.55073	0.56909	0.58753	0.60605	0.62467	0.64337	0.66216	0.68105	0.70001	0.71907	0.73821	0.75743	0.77673	0.79612	0.81557	0.83511	0.85472	0.8744	0.89414	0.91396	0.93384	0.95379	0.97379	0.99386	1.01399	1.03417	1.05441	1.0747	1.09505	1.11544	1.13589	1.15638	1.17692	1.19751	1.21814	1.23881	1.25952	1.28027	1.30107	1.3219	1.34276	1.36367	1.38461	1.40558	1.42659	1.44762	1.46869	1.48979	1.51092
67	0.54929	0.56686	0.5845	0.60222	0.62002	0.6379	0.65586	0.6739	0.69202	0.71022	0.72849	0.74685	0.76528	0.78378	0.80236	0.82101	0.83972	0.8585	0.87735	0.89627	0.91524	0.93428	0.95337	0.97252	0.99173	1.01099	1.03031	1.04967	1.06909	1.08856	1.10807	1.12763	1.14724	1.16689	1.18658	1.20631	1.22609	1.2459	1.26575	1.28564	1.30557	1.32553	1.34552	1.36555	1.38561	1.4057	1.42583	1.44598	1.46616
68	0.54827	0.56509	0.58198	0.59894	0.61596	0.63306	0.65023	0.66747	0.68479	0.70218	0.71964	0.73718	0.75478	0.77245	0.79019	0.808	0.82587	0.8438	0.8618	0.87986	0.89797	0.91614	0.93437	0.95265	0.97099	0.98938	1.00782	1.02631	1.04484	1.06343	1.08206	1.10073	1.11945	1.13821	1.15701	1.17585	1.19473	1.21365	1.23261	1.2516	1.27063	1.28969	1.30878	1.32791	1.34707	1.36627	1.38549	1.40474	1.42402
69	0.54765	0.56377	0.57994	0.59617	0.61247	0.62882	0.64525	0.66174	0.6783	0.69492	0.71161	0.72837	0.74519	0.76207	0.77902	0.79603	0.8131	0.83023	0.84742	0.86466	0.88196	0.89931	0.91672	0.93418	0.95169	0.96925	0.98685	1.00451	1.02221	1.03995	1.05774	1.07558	1.09345	1.11136	1.12932	1.14731	1.16534	1.18341	1.20152	1.21966	1.23783	1.25604	1.27428	1.29255	1.31085	1.32919	1.34755	1.36595	1.38437
70	0.54741	0.56286	0.57836	0.5939	0.6095	0.62516	0.64088	0.65665	0.67249	0.68839	0.70435	0.72037	0.73645	0.75259	0.76879	0.78504	0.80135	0.81772	0.83414	0.85062	0.86714	0.88372	0.90035	0.91702	0.93375	0.95052	0.96734	0.9842	1.00111	1.01805	1.03505	1.05208	1.06915	1.08626	1.10341	1.1206	1.13782	1.15508	1.17238	1.1897	1.20707	1.22446	1.24189	1.25934	1.27683	1.29435	1.3119	1.32947	1.34707
71	0.54754	0.56235	0.5772	0.5921	0.60704	0.62204	0.63709	0.65219	0.66734	0.68256	0.69782	0.71315	0.72852	0.74396	0.75944	0.77498	0.79057	0.80622	0.82191	0.83766	0.85345	0.86929	0.88518	0.90111	0.91709	0.93312	0.94919	0.9653	0.98145	0.99764	1.01388	1.03015	1.04646	1.06281	1.07919	1.09561	1.11207	1.12856	1.14508	1.16164	1.17823	1.19485	1.2115	1.22818	1.24489	1.26163	1.2784	1.2952	1.31202
72	0.54801	0.56222	0.57646	0.59074	0.60506	0.61943	0.63384	0.6483	0.66281	0.67738	0.69199	0.70665	0.72136	0.73612	0.75094	0.7658	0.78071	0.79567	0.81067	0.82572	0.84082	0.85597	0.87115	0.88638	0.90166	0.91697	0.93233	0.94773	0.96316	0.97864	0.99415	1.0097	1.02529	1.04091	1.05657	1.07226	1.08799	1.10375	1.11954	1.13536	1.15122	1.1671	1.18302	1.19896	1.21493	1.23093	1.24696	1.26301	1.27909
73	0.5488	0.56244	0.57611	0.58981	0.60354	0.61731	0.63112	0.64497	0.65887	0.67282	0.68681	0.70084	0.71492	0.72905	0.74322	0.75744	0.77171	0.78602	0.80037	0.81476	0.8292	0.84368	0.85821	0.87277	0.88737	0.90202	0.9167	0.93142	0.94617	0.96097	0.9758	0.99066	1.00556	1.0205	1.03547	1.05047	1.0655	1.08056	1.09566	1.11078	1.12594	1.14112	1.15634	1.17158	1.18685	1.20214	1.21746	1.23281	1.24819
74	0.54991	0.56301	0.57613	0.58927	0.60244	0.61565	0.62889	0.64217	0.65549	0.66884	0.68225	0.69569	0.70917	0.7227	0.73627	0.74987	0.76353	0.77722	0.79095	0.80473	0.81854	0.83239	0.84628	0.86021	0.87418	0.88818	0.90223	0.9163	0.93041	0.94456	0.95874	0.97296	0.9872	1.00148	1.01579	1.03014	1.04451	1.05891	1.07335	1.08781	1.1023	1.11682	1.13136	1.14594	1.16054	1.17516	1.18981	1.20449	1.21919
75	0.55132	0.56391	0.5765	0.58912	0.60176	0.61443	0.62713	0.63986	0.65263	0.66543	0.67827	0.69115	0.70407	0.71702	0.73002	0.74305	0.75612	0.76923	0.78237	0.79556	0.80878	0.82203	0.83533	0.84866	0.86202	0.87542	0.88885	0.90232	0.91582	0.92935	0.94291	0.95651	0.97014	0.98379	0.99748	1.0112	1.02495	1.03872	1.05253	1.06636	1.08022	1.0941	1.10801	1.12195	1.13592	1.1499	1.16392	1.17795	1.19201
76	0.55301	0.56511	0.57721	0.58933	0.60147	0.61363	0.62581	0.63803	0.65027	0.66255	0.67486	0.68721	0.69958	0.712	0.72445	0.73693	0.74945	0.762	0.77459	0.78722	0.79987	0.81256	0.82529	0.83805	0.85084	0.86366	0.87652	0.8894	0.90232	0.91527	0.92825	0.94126	0.9543	0.96736	0.98046	0.99358	1.00673	1.01991	1.03312	1.04635	1.05961	1.07289	1.0862	1.09953	1.11289	1.12627	1.13968	1.15311	1.16656
77	0.55498	0.56661	0.57825	0.58989	0.60155	0.61322	0.62492	0.63664	0.64839	0.66017	0.67198	0.68382	0.69568	0.70758	0.71952	0.73148	0.74348	0.7555	0.76756	0.77965	0.79178	0.80393	0.81612	0.82833	0.84058	0.85286	0.86517	0.8775	0.88987	0.90226	0.91469	0.92714	0.93962	0.95212	0.96466	0.97722	0.9898	1.00241	1.01505	1.02771	1.0404	1.05311	1.06584	1.0786	1.09138	1.10419	1.11702	1.12987	1.14274
78	0.5572	0.5684	0.57959	0.59078	0.60198	0.6132	0.62443	0.63569	0.64697	0.65827	0.6696	0.68096	0.69234	0.70375	0.71519	0.72666	0.73816	0.74969	0.76125	0.77284	0.78445	0.7961	0.80777	0.81947	0.8312	0.84296	0.85475	0.86656	0.8784	0.89027	0.90217	0.91409	0.92604	0.93801	0.95001	0.96203	0.97408	0.98615	0.99825	1.01037	1.02251	1.03468	1.04687	1.05908	1.07132	1.08357	1.09585	1.10815	1.12046
79	0.55968	0.57045	0.58122	0.59198	0.60275	0.61354	0.62433	0.63514	0.64597	0.65683	0.6677	0.6786	0.68952	0.70047	0.71145	0.72245	0.73348	0.74453	0.75561	0.76672	0.77785	0.78902	0.8002	0.81142	0.82266	0.83392	0.84522	0.85653	0.86788	0.87925	0.89064	0.90206	0.9135	0.92497	0.93646	0.94797	0.95951	0.97107	0.98265	0.99426	1.00588	1.01753	1.0292	1.0409	1.05261	1.06434	1.0761	1.08787	1.09966
80	0.5624	0.57277	0.58313	0.59349	0.60385	0.61422	0.62459	0.63498	0.64539	0.65581	0.66626	0.67672	0.68721	0.69772	0.70825	0.71881	0.72939	0.73999	0.75062	0.76127	0.77195	0.78265	0.79338	0.80413	0.8149	0.8257	0.83652	0.84737	0.85824	0.86913	0.88005	0.89099	0.90195	0.91294	0.92395	0.93498	0.94603	0.9571	0.96819	0.97931	0.99045	1.0016	1.01278	1.02398	1.0352	1.04643	1.05769	1.06896	1.08026
81	0.56535	0.57534	0.58532	0.59529	0.60526	0.61523	0.62521	0.6352	0.6452	0.65521	0.66525	0.6753	0.68537	0.69546	0.70557	0.71571	0.72586	0.73604	0.74624	0.75646	0.7667	0.77696	0.78725	0.79756	0.80789	0.81825	0.82862	0.83902	0.84944	0.85989	0.87035	0.88084	0.89134	0.90187	0.91242	0.92299	0.93358	0.94419	0.95482	0.96547	0.97614	0.98683	0.99754	1.00826	1.01901	1.02977	1.04056	1.05136	1.06218
82	0.56851	0.57815	0.58776	0.59736	0.60696	0.61655	0.62615	0.63576	0.64538	0.65501	0.66465	0.67431	0.68399	0.69368	0.70339	0.71312	0.72287	0.73264	0.74243	0.75224	0.76207	0.77192	0.78179	0.79168	0.8016	0.81153	0.82148	0.83145	0.84145	0.85146	0.86149	0.87155	0.88162	0.89171	0.90183	0.91196	0.92211	0.93228	0.94247	0.95268	0.9629	0.97315	0.98341	0.99369	1.00399	1.0143	1.02463	1.03498	1.04535
83	0.5719	0.58118	0.59045	0.5997	0.60894	0.61818	0.62742	0.63666	0.64592	0.65518	0.66445	0.67374	0.68304	0.69235	0.70169	0.71103	0.7204	0.72978	0.73918	0.7486	0.75804	0.76749	0.77697	0.78646	0.79597	0.80551	0.81505	0.82462	0.83421	0.84382	0.85344	0.86308	0.87274	0.88242	0.89212	0.90184	0.91157	0.92132	0.93109	0.94088	0.95068	0.9605	0.97034	0.98019	0.99007	0.99995	1.00986	1.01978	1.02971
84	0.57548	0.58444	0.59338	0.60229	0.61119	0.62009	0.62899	0.63789	0.64679	0.6557	0.66463	0.67356	0.6825	0.69146	0.70043	0.70941	0.71841	0.72743	0.73646	0.7455	0.75457	0.76365	0.77275	0.78186	0.79099	0.80014	0.80931	0.81849	0.82769	0.83691	0.84615	0.8554	0.86467	0.87396	0.88326	0.89258	0.90192	0.91127	0.92064	0.93002	0.93943	0.94884	0.95828	0.96773	0.97719	0.98667	0.99617	1.00568	1.01521
85	0.57927	0.58791	0.59653	0.60513	0.61371	0.62228	0.63085	0.63942	0.648	0.65657	0.66516	0.67375	0.68236	0.69097	0.6996	0.70823	0.71689	0.72555	0.73423	0.74292	0.75163	0.76036	0.7691	0.77785	0.78662	0.79541	0.80421	0.81303	0.82186	0.83071	0.83958	0.84846	0.85736	0.86627	0.8752	0.88414	0.8931	0.90207	0.91106	0.92007	0.92909	0.93812	0.94717	0.95624	0.96532	0.97441	0.98352	0.99264	1.00178
86	0.58324	0.59159	0.5999	0.6082	0.61647	0.62474	0.633	0.64125	0.64951	0.65777	0.66604	0.67431	0.68259	0.69087	0.69917	0.70748	0.7158	0.72414	0.73248	0.74084	0.74921	0.75759	0.76599	0.77441	0.78283	0.79127	0.79973	0.8082	0.81668	0.82518	0.83369	0.84222	0.85076	0.85932	0.86789	0.87648	0.88508	0.89369	0.90232	0.91096	0.91962	0.92829	0.93697	0.94567	0.95438	0.96311	0.97185	0.9806	0.98937
87	0.5874	0.59546	0.60349	0.61149	0.61948	0.62745	0.63541	0.64337	0.65132	0.65928	0.66724	0.67521	0.68318	0.69115	0.69914	0.70714	0.71514	0.72316	0.73118	0.73922	0.74727	0.75533	0.76341	0.77149	0.77959	0.78771	0.79583	0.80397	0.81212	0.82029	0.82846	0.83666	0.84486	0.85308	0.86131	0.86955	0.87781	0.88608	0.89437	0.90267	0.91098	0.9193	0.92764	0.93599	0.94435	0.95272	0.96111	0.96951	0.97792
88	0.59173	0.59952	0.60728	0.615	0.62271	0.6304	0.63808	0.64575	0.65342	0.66109	0.66876	0.67643	0.68411	0.69179	0.69948	0.70718	0.71488	0.7226	0.73032	0.73805	0.7458	0.75355	0.76132	0.76909	0.77688	0.78468	0.79249	0.80031	0.80815	0.816	0.82386	0.83173	0.83961	0.84751	0.85541	0.86334	0.87127	0.87921	0.88717	0.89514	0.90312	0.91111	0.91912	0.92714	0.93517	0.94321	0.95126	0.95932	0.9674
89	0.59624	0.60377	0.61126	0.61873	0.62616	0.63359	0.641	0.6484	0.65579	0.66319	0.67058	0.67797	0.68537	0.69277	0.70018	0.70759	0.71501	0.72243	0.72987	0.73731	0.74476	0.75222	0.7597	0.76718	0.77467	0.78217	0.78968	0.7972	0.80474	0.81228	0.81984	0.8274	0.83498	0.84257	0.85017	0.85778	0.86541	0.87304	0.88069	0.88834	0.89601	0.90369	0.91138	0.91908	0.92679	0.93452	0.94225	0.95	0.95775
90	0.60091	0.6082	0.61544	0.62265	0.62983	0.637	0.64415	0.65129	0.65843	0.66556	0.67269	0.67982	0.68695	0.69408	0.70121	0.70835	0.7155	0.72265	0.72981	0.73698	0.74415	0.75133	0.75852	0.76572	0.77293	0.78015	0.78738	0.79461	0.80186	0.80912	0.81638	0.82366	0.83095	0.83824	0.84555	0.85287	0.8602	0.86753	0.87488	0.88224	0.88961	0.89699	0.90438	0.91178	0.91919	0.92661	0.93404	0.94148	0.94893
91	0.60574	0.61279	0.61979	0.62676	0.63371	0.64063	0.64754	0.65443	0.66132	0.6682	0.67507	0.68195	0.68882	0.6957	0.70258	0.70946	0.71634	0.72324	0.73013	0.73703	0.74394	0.75086	0.75778	0.76471	0.77165	0.7786	0.78556	0.79252	0.79949	0.80647	0.81347	0.82047	0.82747	0.83449	0.84152	0.84856	0.85561	0.86266	0.86973	0.8768	0.88389	0.89098	0.89809	0.9052	0.91232	0.91945	0.9266	0.93375	0.94091
92	0.61073	0.61755	0.62433	0.63107	0.63778	0.64447	0.65114	0.6578	0.66445	0.67109	0.67772	0.68436	0.69099	0.69762	0.70425	0.71089	0.71753	0.72417	0.73081	0.73746	0.74412	0.75078	0.75745	0.76413	0.77081	0.7775	0.78419	0.7909	0.79761	0.80433	0.81106	0.8178	0.82454	0.83129	0.83806	0.84483	0.85161	0.85839	0.86519	0.87199	0.87881	0.88563	0.89246	0.8993	0.90615	0.91301	0.91987	0.92675	0.93363
93	0.61587	0.62248	0.62903	0.63555	0.64204	0.64851	0.65496	0.66139	0.66781	0.67422	0.68063	0.68703	0.69343	0.69983	0.70623	0.71263	0.71903	0.72543	0.73184	0.73825	0.74466	0.75109	0.75751	0.76394	0.77038	0.77682	0.78327	0.78973	0.79619	0.80266	0.80914	0.81563	0.82212	0.82862	0.83513	0.84164	0.84817	0.8547	0.86124	0.86779	0.87434	0.8809	0.88748	0.89406	0.90064	0.90724	0.91384	0.92045	0.92707
94	0.62115	0.62755	0.6339	0.64021	0.64649	0.65275	0.65898	0.6652	0.6714	0.67759	0.68378	0.68996	0.69614	0.70232	0.70849	0.71466	0.72084	0.72702	0.7332	0.73938	0.74556	0.75175	0.75795	0.76414	0.77035	0.77656	0.78277	0.78899	0.79522	0.80145	0.80769	0.81394	0.82019	0.82645	0.83271	0.83899	0.84527	0.85155	0.85785	0.86415	0.87046	0.87678	0.8831	0.88943	0.89577	0.90212	0.90847	0.91483	0.9212
95	0.62658	0.63278	0.63894	0.64504	0.65112	0.65717	0.6632	0.66921	0.67521	0.68119	0.68717	0.69314	0.69911	0.70507	0.71103	0.71699	0.72295	0.72891	0.73487	0.74083	0.7468	0.75277	0.75874	0.76472	0.7707	0.77668	0.78267	0.78867	0.79467	0.80067	0.80668	0.8127	0.81872	0.82475	0.83079	0.83683	0.84288	0.84893	0.85499	0.86106	0.86713	0.87322	0.8793	0.8854	0.8915	0.89761	0.90372	0.90984	0.91597
96	0.63215	0.63816	0.64412	0.65004	0.65592	0.66178	0.66761	0.67342	0.67922	0.68501	0.69079	0.69655	0.70232	0.70808	0.71383	0.71959	0.72534	0.73109	0.73685	0.7426	0.74836	0.75412	0.75988	0.76564	0.77141	0.77718	0.78295	0.78873	0.79452	0.80031	0.8061	0.8119	0.8177	0.82351	0.82933	0.83515	0.84098	0.84681	0.85265	0.85849	0.86434	0.8702	0.87606	0.88193	0.8878	0.89368	0.89957	0.90546	0.91136
97	0.63785	0.64368	0.64946	0.65519	0.66089	0.66656	0.6722	0.67783	0.68344	0.68903	0.69462	0.7002	0.70577	0.71133	0.71689	0.72245	0.72801	0.73356	0.73912	0.74467	0.75023	0.75578	0.76134	0.7669	0.77247	0.77804	0.78361	0.78918	0.79476	0.80034	0.80593	0.81152	0.81711	0.82271	0.82832	0.83393	0.83954	0.84516	0.85079	0.85642	0.86206	0.8677	0.87334	0.879	0.88466	0.89032	0.89599	0.90167	0.90735
98	0.64368	0.64934	0.65494	0.6605	0.66602	0.67151	0.67698	0.68242	0.68785	0.69326	0.69867	0.70406	0.70944	0.71482	0.7202	0.72557	0.73093	0.7363	0.74167	0.74703	0.75239	0.75776	0.76313	0.76849	0.77386	0.77924	0.78461	0.78999	0.79537	0.80075	0.80614	0.81153	0.81693	0.82233	0.82773	0.83314	0.83856	0.84397	0.8494	0.85482	0.86025	0.86569	0.87113	0.87658	0.88203	0.88749	0.89295	0.89842	0.90389
99	0.64964	0.65513	0.66057	0.66596	0.67131	0.67663	0.68192	0.6872	0.69245	0.69769	0.70292	0.70813	0.71334	0.71854	0.72374	0.72893	0.73412	0.7393	0.74448	0.74967	0.75485	0.76003	0.76521	0.77039	0.77558	0.78076	0.78595	0.79114	0.79634	0.80153	0.80673	0.81193	0.81714	0.82235	0.82756	0.83277	0.83799	0.84322	0.84845	0.85368	0.85892	0.86416	0.86941	0.87466	0.87991	0.88517	0.89043	0.8957	0.90098
100	0.65572	0.66106	0.66633	0.67156	0.67675	0.68191	0.68704	0.69215	0.69723	0.70231	0.70736	0.71241	0.71745	0.72248	0.72751	0.73253	0.73754	0.74255	0.74756	0.75257	0.75758	0.76258	0.76759	0.77259	0.7776	0.78261	0.78762	0.79263	0.79764	0.80266	0.80767	0.81269	0.81772	0.82274	0.82777	0.83281	0.83784	0.84288	0.84793	0.85297	0.85802	0.86308	0.86814	0.8732	0.87827	0.88334	0.88841	0.89349	0.89858
101	0.66192	0.66711	0.67223	0.67731	0.68234	0.68734	0.69231	0.69726	0.70219	0.70711	0.712	0.71689	0.72177	0.72663	0.7315	0.73635	0.7412	0.74605	0.75089	0.75573	0.76057	0.76541	0.77024	0.77508	0.77992	0.78476	0.78959	0.79443	0.79927	0.80412	0.80896	0.81381	0.81866	0.82351	0.82836	0.83322	0.83808	0.84294	0.84781	0.85268	0.85755	0.86243	0.86731	0.87219	0.87708	0.88197	0.88687	0.89176	0.89667
102	0.66825	0.67329	0.67826	0.68319	0.68808	0.69293	0.69775	0.70255	0.70732	0.71208	0.71683	0.72156	0.72628	0.73099	0.7357	0.74039	0.74509	0.74977	0.75446	0.75914	0.76382	0.7685	0.77317	0.77785	0.78252	0.78719	0.79187	0.79655	0.80122	0.8059	0.81058	0.81526	0.81994	0.82463	0.82931	0.834	0.83869	0.84339	0.84809	0.85279	0.85749	0.86219	0.8669	0.87162	0.87633	0.88105	0.88577	0.8905	0.89523
103	0.67469	0.67959	0.68442	0.68921	0.69395	0.69866	0.70334	0.70799	0.71262	0.71723	0.72183	0.72641	0.73099	0.73555	0.7401	0.74465	0.74919	0.75373	0.75826	0.76279	0.76731	0.77184	0.77636	0.78088	0.7854	0.78991	0.79443	0.79895	0.80347	0.80799	0.81251	0.81703	0.82156	0.82608	0.83061	0.83514	0.83967	0.8442	0.84874	0.85327	0.85781	0.86236	0.8669	0.87145	0.876	0.88056	0.88511	0.88967	0.89424
104	0.68124	0.686	0.69071	0.69536	0.69996	0.70453	0.70907	0.71358	0.71808	0.72255	0.727	0.73145	0.73588	0.7403	0.74471	0.74911	0.75351	0.7579	0.76228	0.76666	0.77104	0.77542	0.77979	0.78416	0.78853	0.7929	0.79727	0.80164	0.80601	0.81038	0.81475	0.81912	0.82349	0.82786	0.83223	0.83661	0.84099	0.84536	0.84974	0.85413	0.85851	0.8629	0.86729	0.87168	0.87607	0.88047	0.88487	0.88927	0.89368
105	0.6879	0.69254	0.69711	0.70163	0.70611	0.71055	0.71495	0.71933	0.72369	0.72803	0.73235	0.73665	0.74095	0.74523	0.7495	0.75377	0.75802	0.76228	0.76652	0.77076	0.775	0.77924	0.78347	0.7877	0.79193	0.79615	0.80038	0.8046	0.80883	0.81305	0.81727	0.8215	0.82572	0.82995	0.83418	0.83841	0.84263	0.84687	0.8511	0.85533	0.85957	0.8638	0.86804	0.87229	0.87653	0.88078	0.88502	0.88927	0.89353
106	0.69467	0.69919	0.70364	0.70803	0.71238	0.71669	0.72097	0.72522	0.72945	0.73366	0.73785	0.74203	0.74619	0.75034	0.75448	0.75862	0.76274	0.76686	0.77097	0.77508	0.77918	0.78328	0.78738	0.79147	0.79556	0.79965	0.80374	0.80783	0.81191	0.816	0.82008	0.82417	0.82825	0.83234	0.83643	0.84051	0.8446	0.84869	0.85278	0.85687	0.86097	0.86506	0.86916	0.87326	0.87736	0.88146	0.88556	0.88967	0.89377
107	0.70155	0.70595	0.71028	0.71455	0.71878	0.72297	0.72713	0.73126	0.73537	0.73945	0.74352	0.74757	0.7516	0.75563	0.75964	0.76365	0.76765	0.77164	0.77562	0.7796	0.78357	0.78754	0.79151	0.79547	0.79943	0.80339	0.80735	0.8113	0.81526	0.81921	0.82316	0.82711	0.83106	0.83502	0.83897	0.84292	0.84687	0.85083	0.85478	0.85874	0.86269	0.86665	0.87061	0.87457	0.87854	0.8825	0.88646	0.89043	0.8944
108	0.70853	0.71282	0.71703	0.72119	0.72531	0.72938	0.73342	0.73743	0.74142	0.74539	0.74933	0.75326	0.75718	0.76109	0.76498	0.76886	0.77274	0.7766	0.78047	0.78432	0.78817	0.79202	0.79586	0.79969	0.80353	0.80736	0.81119	0.81502	0.81885	0.82267	0.8265	0.83032	0.83415	0.83797	0.84179	0.84562	0.84944	0.85326	0.85709	0.86091	0.86474	0.86857	0.8724	0.87622	0.88006	0.88389	0.88772	0.89155	0.89539
109	0.71561	0.71979	0.7239	0.72795	0.73195	0.73592	0.73984	0.74374	0.74762	0.75147	0.7553	0.75912	0.76292	0.76671	0.77048	0.77425	0.77801	0.78176	0.7855	0.78924	0.79297	0.79669	0.80042	0.80413	0.80785	0.81156	0.81527	0.81898	0.82268	0.82639	0.83009	0.83379	0.83749	0.84119	0.84489	0.84859	0.85229	0.85599	0.85969	0.86339	0.86709	0.87079	0.8745	0.8782	0.8819	0.88561	0.88931	0.89302	0.89673
110	0.72279	0.72687	0.73087	0.73482	0.73872	0.74257	0.74639	0.75018	0.75395	0.75769	0.76141	0.76512	0.76881	0.77249	0.77615	0.7798	0.78345	0.78709	0.79072	0.79434	0.79796	0.80157	0.80518	0.80878	0.81238	0.81597	0.81957	0.82316	0.82675	0.83033	0.83392	0.8375	0.84109	0.84467	0.84825	0.85183	0.85541	0.85899	0.86257	0.86615	0.86974	0.87332	0.8769	0.88048	0.88406	0.88765	0.89123	0.89482	0.8984
111	0.73007	0.73405	0.73796	0.7418	0.74559	0.74935	0.75306	0.75675	0.76041	0.76405	0.76767	0.77127	0.77485	0.77842	0.78198	0.78552	0.78906	0.79259	0.79611	0.79962	0.80313	0.80663	0.81013	0.81362	0.81711	0.8206	0.82408	0.82756	0.83104	0.83451	0.83799	0.84146	0.84493	0.8484	0.85186	0.85533	0.8588	0.86226	0.86573	0.8692	0.87266	0.87613	0.87959	0.88306	0.88653	0.89	0.89346	0.89693	0.9004
112	0.73745	0.74133	0.74514	0.74889	0.75259	0.75624	0.75986	0.76344	0.767	0.77054	0.77406	0.77755	0.78104	0.7845	0.78796	0.7914	0.79484	0.79826	0.80168	0.80509	0.80849	0.81189	0.81528	0.81866	0.82205	0.82543	0.8288	0.83217	0.83554	0.83891	0.84228	0.84564	0.849	0.85236	0.85572	0.85908	0.86244	0.86579	0.86915	0.8725	0.87586	0.87922	0.88257	0.88593	0.88928	0.89264	0.896	0.89935	0.90271
113	0.74492	0.74871	0.75243	0.75608	0.75969	0.76325	0.76677	0.77026	0.77372	0.77716	0.78058	0.78398	0.78737	0.79074	0.79409	0.79744	0.80077	0.80409	0.80741	0.81072	0.81402	0.81732	0.82061	0.82389	0.82717	0.83045	0.83372	0.83699	0.84026	0.84352	0.84679	0.85004	0.8533	0.85656	0.85981	0.86307	0.86632	0.86957	0.87282	0.87607	0.87932	0.88257	0.88582	0.88907	0.89232	0.89557	0.89882	0.90207	0.90532
114	0.75249	0.75619	0.75982	0.76338	0.7669	0.77037	0.7738	0.7772	0.78057	0.78391	0.78724	0.79055	0.79383	0.79711	0.80037	0.80362	0.80686	0.81009	0.81331	0.81652	0.81972	0.82292	0.82612	0.8293	0.83249	0.83566	0.83884	0.84201	0.84518	0.84834	0.85151	0.85467	0.85782	0.86098	0.86413	0.86729	0.87044	0.87359	0.87674	0.87989	0.88304	0.88618	0.88933	0.89248	0.89562	0.89877	0.90192	0.90506	0.90821
115	0.76015	0.76376	0.76731	0.77079	0.77421	0.77759	0.78094	0.78425	0.78753	0.79079	0.79402	0.79724	0.80044	0.80362	0.80679	0.80995	0.8131	0.81623	0.81936	0.82248	0.82559	0.8287	0.8318	0.83489	0.83798	0.84106	0.84414	0.84722	0.85029	0.85336	0.85643	0.85949	0.86256	0.86562	0.86867	0.87173	0.87479	0.87784	0.88089	0.88394	0.88699	0.89004	0.89309	0.89614	0.89919	0.90224	0.90529	0.90834	0.91138
116	0.76789	0.77143	0.77489	0.77829	0.78163	0.78493	0.78819	0.79141	0.79461	0.79778	0.80093	0.80406	0.80717	0.81027	0.81335	0.81642	0.81948	0.82253	0.82557	0.8286	0.83162	0.83464	0.83765	0.84065	0.84365	0.84664	0.84963	0.85262	0.8556	0.85858	0.86155	0.86452	0.86749	0.87046	0.87343	0.87639	0.87935	0.88231	0.88527	0.88823	0.89119	0.89415	0.8971	0.90006	0.90301	0.90596	0.90892	0.91187	0.91482
117	0.77573	0.77919	0.78257	0.78589	0.78915	0.79237	0.79555	0.79869	0.80181	0.8049	0.80796	0.81101	0.81404	0.81705	0.82005	0.82303	0.82601	0.82897	0.83192	0.83487	0.83781	0.84074	0.84366	0.84658	0.84949	0.85239	0.8553	0.85819	0.86109	0.86398	0.86687	0.86975	0.87263	0.87551	0.87839	0.88126	0.88414	0.88701	0.88988	0.89275	0.89561	0.89848	0.90134	0.90421	0.90707	0.90994	0.9128	0.91566	0.91852
118	0.78365	0.78704	0.79035	0.79359	0.79677	0.79991	0.80302	0.80608	0.80912	0.81213	0.81511	0.81808	0.82103	0.82396	0.82688	0.82978	0.83267	0.83555	0.83843	0.84129	0.84414	0.84699	0.84983	0.85266	0.85549	0.85831	0.86113	0.86395	0.86676	0.86956	0.87237	0.87516	0.87796	0.88076	0.88355	0.88634	0.88912	0.89191	0.89469	0.89748	0.90026	0.90304	0.90581	0.90859	0.91137	0.91414	0.91692	0.91969	0.92247
119	0.79166	0.79498	0.79821	0.80138	0.80449	0.80756	0.81059	0.81358	0.81654	0.81947	0.82238	0.82527	0.82814	0.831	0.83383	0.83666	0.83947	0.84228	0.84507	0.84785	0.85063	0.85339	0.85616	0.85891	0.86166	0.8644	0.86714	0.86987	0.8726	0.87532	0.87805	0.88076	0.88348	0.88619	0.8889	0.89161	0.89431	0.89701	0.89972	0.90242	0.90511	0.90781	0.91051	0.9132	0.91589	0.91858	0.92128	0.92397	0.92666
120	0.79976	0.803	0.80617	0.80927	0.81231	0.81531	0.81826	0.82118	0.82407	0.82693	0.82976	0.83258	0.83537	0.83815	0.84092	0.84367	0.84641	0.84913	0.85185	0.85456	0.85726	0.85995	0.86263	0.86531	0.86798	0.87064	0.8733	0.87596	0.87861	0.88126	0.8839	0.88654	0.88918	0.89181	0.89444	0.89707	0.89969	0.90232	0.90494	0.90756	0.91018	0.91279	0.91541	0.91802	0.92064	0.92325	0.92586	0.92847	0.93108
121	0.80794	0.81112	0.81422	0.81725	0.82022	0.82315	0.82603	0.82888	0.8317	0.83449	0.83726	0.84	0.84272	0.84543	0.84812	0.8508	0.85347	0.85612	0.85877	0.8614	0.86403	0.86664	0.86925	0.87186	0.87445	0.87704	0.87963	0.88221	0.88479	0.88736	0.88993	0.89249	0.89505	0.89761	0.90016	0.90271	0.90526	0.90781	0.91036	0.9129	0.91544	0.91798	0.92052	0.92306	0.92559	0.92813	0.93066	0.93319	0.93572
122	0.8162	0.81932	0.82235	0.82532	0.82823	0.83109	0.83391	0.83669	0.83944	0.84216	0.84486	0.84753	0.85019	0.85283	0.85545	0.85806	0.86066	0.86324	0.86581	0.86838	0.87093	0.87348	0.87602	0.87855	0.88107	0.88359	0.88611	0.88862	0.89112	0.89362	0.89612	0.89861	0.9011	0.90358	0.90606	0.90854	0.91102	0.91349	0.91596	0.91843	0.9209	0.92337	0.92583	0.92829	0.93076	0.93322	0.93567	0.93813	0.94059
123	0.82454	0.8276	0.83057	0.83348	0.83632	0.83912	0.84188	0.84459	0.84728	0.84994	0.85257	0.85518	0.85777	0.86034	0.8629	0.86544	0.86797	0.87048	0.87299	0.87549	0.87797	0.88045	0.88292	0.88538	0.88784	0.89029	0.89274	0.89518	0.89761	0.90004	0.90247	0.90489	0.90731	0.90972	0.91213	0.91454	0.91695	0.91935	0.92175	0.92415	0.92655	0.92894	0.93134	0.93373	0.93612	0.93851	0.94089	0.94328	0.94566
124	0.83296	0.83596	0.83888	0.84173	0.84451	0.84725	0.84994	0.8526	0.85522	0.85781	0.86038	0.86293	0.86546	0.86796	0.87046	0.87293	0.8754	0.87785	0.88029	0.88272	0.88514	0.88756	0.88996	0.89236	0.89475	0.89713	0.89951	0.90188	0.90425	0.90661	0.90897	0.91133	0.91368	0.91603	0.91837	0.92071	0.92305	0.92539	0.92772	0.93005	0.93238	0.9347	0.93703	0.93935	0.94167	0.94399	0.94631	0.94863	0.95094
125	0.84147	0.84441	0.84727	0.85006	0.85279	0.85547	0.8581	0.8607	0.86326	0.86579	0.8683	0.87079	0.87325	0.8757	0.87813	0.88055	0.88295	0.88534	0.88772	0.89008	0.89244	0.89479	0.89713	0.89947	0.90179	0.90411	0.90643	0.90874	0.91104	0.91334	0.91563	0.91792	0.92021	0.92249	0.92477	0.92705	0.92932	0.93159	0.93386	0.93612	0.93839	0.94065	0.94291	0.94516	0.94742	0.94967	0.95192	0.95417	0.95642
126	0.85005	0.85294	0.85575	0.85848	0.86115	0.86377	0.86635	0.86889	0.87139	0.87387	0.87632	0.87875	0.88115	0.88354	0.88591	0.88827	0.89061	0.89294	0.89526	0.89757	0.89986	0.90215	0.90443	0.90671	0.90897	0.91123	0.91348	0.91573	0.91797	0.92021	0.92244	0.92467	0.92689	0.92911	0.93133	0.93354	0.93575	0.93796	0.94016	0.94237	0.94457	0.94676	0.94896	0.95115	0.95334	0.95553	0.95772	0.95991	0.96209
127	0.85871	0.86155	0.8643	0.86698	0.8696	0.87217	0.87469	0.87718	0.87963	0.88205	0.88444	0.88681	0.88916	0.89149	0.89381	0.8961	0.89839	0.90066	0.90292	0.90517	0.90741	0.90964	0.91186	0.91407	0.91628	0.91848	0.92067	0.92286	0.92504	0.92722	0.92939	0.93156	0.93373	0.93589	0.93804	0.94019	0.94234	0.94449	0.94663	0.94878	0.95091	0.95305	0.95518	0.95732	0.95945	0.96157	0.9637	0.96583	0.96795
128	0.86744	0.87024	0.87294	0.87557	0.87814	0.88065	0.88312	0.88555	0.88795	0.89032	0.89266	0.89497	0.89727	0.89955	0.9018	0.90405	0.90628	0.90849	0.9107	0.91289	0.91507	0.91725	0.91941	0.92157	0.92372	0.92586	0.928	0.93013	0.93225	0.93437	0.93649	0.9386	0.9407	0.9428	0.9449	0.947	0.94909	0.95118	0.95326	0.95535	0.95743	0.9595	0.96158	0.96365	0.96572	0.96779	0.96986	0.97192	0.97399
129	0.87626	0.879	0.88166	0.88424	0.88676	0.88922	0.89164	0.89402	0.89637	0.89868	0.90097	0.90324	0.90548	0.9077	0.90991	0.9121	0.91427	0.91644	0.91859	0.92072	0.92285	0.92497	0.92708	0.92919	0.93128	0.93337	0.93545	0.93752	0.93959	0.94166	0.94372	0.94577	0.94782	0.94987	0.95191	0.95395	0.95599	0.95802	0.96005	0.96207	0.9641	0.96612	0.96814	0.97015	0.97217	0.97418	0.97619	0.9782	0.9802
130	0.88514	0.88785	0.89046	0.89299	0.89546	0.89788	0.90025	0.90258	0.90488	0.90714	0.90938	0.91159	0.91379	0.91596	0.91811	0.92025	0.92238	0.92449	0.92658	0.92867	0.93075	0.93281	0.93487	0.93692	0.93896	0.941	0.94303	0.94505	0.94707	0.94908	0.95108	0.95308	0.95508	0.95707	0.95906	0.96105	0.96303	0.96501	0.96698	0.96895	0.97092	0.97289	0.97485	0.97681	0.97877	0.98073	0.98268	0.98464	0.98659
131	0.89411	0.89677	0.89933	0.90182	0.90425	0.90662	0.90894	0.91123	0.91347	0.91569	0.91788	0.92005	0.92219	0.92431	0.92642	0.92851	0.93058	0.93264	0.93469	0.93673	0.93875	0.94077	0.94278	0.94478	0.94677	0.94875	0.95073	0.9527	0.95467	0.95663	0.95858	0.96053	0.96247	0.96441	0.96635	0.96828	0.97021	0.97214	0.97406	0.97598	0.9779	0.97981	0.98172	0.98363	0.98554	0.98744	0.98934	0.99124	0.99314
132	0.90314	0.90576	0.90828	0.91073	0.91311	0.91544	0.91772	0.91996	0.92216	0.92433	0.92648	0.92859	0.93069	0.93277	0.93482	0.93687	0.93889	0.94091	0.94291	0.94489	0.94687	0.94884	0.9508	0.95275	0.95469	0.95662	0.95855	0.96047	0.96239	0.9643	0.9662	0.9681	0.97	0.97189	0.97378	0.97566	0.97754	0.97941	0.98128	0.98315	0.98502	0.98688	0.98874	0.9906	0.99246	0.99431	0.99616	0.99801	0.99986
133	0.91225	0.91483	0.91731	0.91972	0.92206	0.92434	0.92658	0.92877	0.93093	0.93306	0.93516	0.93723	0.93928	0.94131	0.94333	0.94532	0.9473	0.94927	0.95122	0.95316	0.9551	0.95702	0.95893	0.96083	0.96273	0.96461	0.96649	0.96837	0.97024	0.9721	0.97395	0.97581	0.97765	0.97949	0.98133	0.98317	0.985	0.98682	0.98865	0.99047	0.99228	0.9941	0.99591	0.99772	0.99953	1.00133	1.00313	1.00493	1.00673
134	0.92143	0.92397	0.92642	0.92878	0.93108	0.93333	0.93552	0.93767	0.93979	0.94188	0.94393	0.94596	0.94797	0.94996	0.95192	0.95388	0.95581	0.95773	0.95964	0.96154	0.96343	0.9653	0.96717	0.96902	0.97087	0.97272	0.97455	0.97638	0.9782	0.98002	0.98183	0.98363	0.98543	0.98723	0.98902	0.99081	0.99259	0.99437	0.99615	0.99792	0.99969	1.00146	1.00322	1.00498	1.00674	1.0085	1.01025	1.01201	1.01376
135	0.93069	0.93319	0.9356	0.93792	0.94019	0.94239	0.94454	0.94666	0.94873	0.95078	0.95279	0.95478	0.95675	0.95869	0.96062	0.96253	0.96442	0.9663	0.96816	0.97002	0.97186	0.97369	0.97551	0.97733	0.97913	0.98093	0.98272	0.9845	0.98628	0.98805	0.98982	0.99158	0.99334	0.99509	0.99683	0.99858	1.00031	1.00205	1.00378	1.00551	1.00723	1.00895	1.01067	1.01239	1.0141	1.01581	1.01752	1.01923	1.02093
136	0.94001	0.94248	0.94485	0.94714	0.94937	0.95153	0.95365	0.95572	0.95776	0.95976	0.96174	0.96369	0.96561	0.96752	0.9694	0.97127	0.97312	0.97496	0.97678	0.97859	0.98039	0.98218	0.98397	0.98574	0.9875	0.98925	0.991	0.99274	0.99448	0.99621	0.99793	0.99965	1.00136	1.00307	1.00477	1.00647	1.00816	1.00986	1.01154	1.01323	1.01491	1.01659	1.01826	1.01993	1.0216	1.02327	1.02494	1.0266	1.02826
137	0.94941	0.95184	0.95418	0.95643	0.95862	0.96075	0.96283	0.96487	0.96687	0.96883	0.97077	0.97268	0.97457	0.97643	0.97828	0.9801	0.98192	0.98371	0.9855	0.98727	0.98903	0.99078	0.99252	0.99425	0.99597	0.99769	0.99939	1.00109	1.00279	1.00447	1.00615	1.00783	1.0095	1.01117	1.01283	1.01449	1.01614	1.01779	1.01943	1.02108	1.02271	1.02435	1.02598	1.02761	1.02924	1.03086	1.03249	1.03411	1.03572
138	0.95887	0.96127	0.96358	0.9658	0.96795	0.97005	0.97209	0.97409	0.97606	0.97799	0.97989	0.98176	0.98361	0.98543	0.98724	0.98903	0.99081	0.99256	0.99431	0.99604	0.99776	0.99947	1.00118	1.00287	1.00455	1.00622	1.00789	1.00955	1.0112	1.01285	1.01449	1.01613	1.01776	1.01939	1.02101	1.02262	1.02424	1.02584	1.02745	1.02905	1.03065	1.03224	1.03384	1.03542	1.03701	1.03859	1.04017	1.04175	1.04333
139	0.9684	0.97078	0.97305	0.97524	0.97736	0.97942	0.98143	0.9834	0.98533	0.98722	0.98908	0.99092	0.99273	0.99452	0.9963	0.99805	0.99979	1.00151	1.00322	1.00491	1.00659	1.00827	1.00993	1.01158	1.01323	1.01486	1.01649	1.01812	1.01973	1.02134	1.02294	1.02454	1.02613	1.02772	1.0293	1.03088	1.03245	1.03402	1.03559	1.03715	1.03871	1.04026	1.04181	1.04336	1.04491	1.04645	1.048	1.04953	1.05107
140	0.97801	0.98035	0.98259	0.98475	0.98684	0.98887	0.99085	0.99278	0.99468	0.99654	0.99836	1.00017	1.00194	1.0037	1.00544	1.00715	1.00886	1.01054	1.01221	1.01387	1.01552	1.01716	1.01878	1.0204	1.02201	1.02361	1.0252	1.02678	1.02836	1.02993	1.0315	1.03306	1.03461	1.03616	1.03771	1.03925	1.04078	1.04231	1.04384	1.04537	1.04689	1.0484	1.04992	1.05143	1.05294	1.05444	1.05595	1.05745	1.05895
[truncated: 2 more columns]
